# Supplementary material
Source: Springer Nature journal article supplement (https://www.springermedizin.de/resource/supplementary/12879_2009_999_MOESM1_ESM.pdf/9442004)
Supplement: MOESM1 [file 9442004]

Table 1: Health personnel reporting at least one needlestick or sharps injury as a proportion of all personnel with the subgroup (491 out of 676 respondents)

| <b>Variables</b>  | <b>NSSI (%)</b> | <b>Variable</b>            | <b>NSSI (%)</b> |
|-------------------|-----------------|----------------------------|-----------------|
| <b>Hospital</b>   |                 | <b>Ethnicity</b>           |                 |
| Hospital A        | 104 (80)        | Pashtoon                   | 320 (74.8)      |
| Hospital B        | 130 (73)        | Tajik                      | 130 (68.8)      |
| Hospital C        | 82 (74.5)       | Hazara                     | 12 (66.7)       |
| Hospital D        | 120 (65.6)      | Uzbek                      | 14 (66.7)       |
| Hospital E        | 55 (73.3)       | Sadaat                     | 15 (75.0)       |
| <b>Occupation</b> |                 | <b>Marital status</b>      |                 |
| Gyn/Obs.          | 49 (96.1)       | Single                     | 87(76.3)        |
| Surgeon           | 102 (91.9)      | Married                    | 404(71.9)       |
| Nurse             | 150 (80.2)      | <b>Education</b>           |                 |
| Dentist           | 52 (75.4)       | Nursing School             | 150 (78.9)      |
| Midwife           | 62 (62.0)       | University                 | 238 (74.1)      |
| Technician        | 19 (50.0)       | Dental School              | 25(71.4)        |
| Physician         | 57 (47.5)       | Midwifery School           | 63 (61.8)       |
| <b>Age</b>        |                 | Medical Technology Inst.   | 15 (53.6)       |
| 20-29             | 118 (73.8)      | <b>Experience</b>          |                 |
| 30-39             | 239 (72.9)      | 0-3yrs                     | 134 (72)        |
| 40-49             | 101 (74.8)      | 4-6yrs                     | 95 (77.9)       |
| 50-59             | 19 (52.8)       | 7-10yrs                    | 57 (76)         |
| 60 and over       | 1 (50)          | More than 10 yrs           | 205 (70)        |
| <b>Gender</b>     |                 | <b>Vaccine hepatitis B</b> |                 |
| Female            | 194(76.4)       | Not vaccinated             | 137 (76.1)      |
| Male              | 297(70.4)       | Vaccinated                 | 354 (72.1)      |

Table 2: Frequency and percentage of sharps injuries by objects during practice

| <b>Variable</b>                  | <b>Frequency</b> | <b>Percent</b> |
|----------------------------------|------------------|----------------|
| While re-capping a needle        | 186              | 24.5           |
| While opening an ampoule or vial | 150              | 19.8           |
| By myself during surgery         | 100              | 13.2           |
| While suturing by suture needle  | 97               | 12.8           |
| By my colleague during surgery   | 94               | 12.4           |
| While opening a needle cap       | 52               | 6.9            |
| Needle penetrated the cap        | 32               | 4.2            |
| While withdrawing medication     | 20               | 2.6            |
| During the disposal of sharps    | 13               | 1.7            |
| While collecting sharps box      | 9                | 1.2            |
| By needle penetrated sharps box  | 5                | 0.7            |
| Total                            | 758              | 100            |

Table 3: Percentage agreement (strongly agree or agree) regarding beliefs, knowledge and practice of HCWs towards HIV and viral hepatitis (response scale options were: strongly agree; agree; no view; disagree; strongly disagree)

| <b>Beliefs</b>                                                                                                                           | <b>strongly agree/agree</b> |       |
|------------------------------------------------------------------------------------------------------------------------------------------|-----------------------------|-------|
| My employer provides adequate safety measures to minimize HIV and viral hepatitis transmission                                           | 613                         | 92.5% |
| My employer provides satisfactory education regarding HIV/AIDS and viral hepatitis                                                       | 614                         | 92.3% |
| I have the right to be informed if an HIV positive patient or a patient with viral hepatitis is present in my direct work area           | 581                         | 88.8% |
| All patients admitted to hospital or attending hospital clinics should be tested for HIV                                                 | 589                         | 89.2% |
| <b>Knowledge</b>                                                                                                                         | <b>Correct</b>              |       |
| Universal precautions are applied to patients with HIV and viral hepatitis only (W)                                                      | 459                         | 67.9% |
| Isolation is necessary for patients with blood-borne infections (W)                                                                      | 203                         | 30%   |
| Used needles can be recapped after giving an injection (W)                                                                               | 121                         | 17.9% |
| For decontamination of devices (with only contact with skin) washing with usual detergent is enough (C)                                  | 275                         | 40.7% |
| Universal precautions are not necessary in situations that might lead to contact with saliva (C)                                         | 192                         | 28.4% |
| HCWs with non intact skin should not be involved in direct patient care until the condition resolves (C)                                 | 459                         | 67.9% |
| Blood spills should be cleaned up promptly with sodium hypochlorite (C)                                                                  | 549                         | 81.2% |
| <b>Practice</b>                                                                                                                          | <b>Correct</b>              |       |
| I assume that blood and all body fluids of patients are infectious (C)                                                                   | 318                         | 47%   |
| I wear mask, gown and eye wear if procedures and patient care activities are likely to cause splashing of blood and deep body fluids (C) | 548                         | 81.1% |
| I dispose of used needles into a sharp box after injection (C)                                                                           | 576                         | 85.2% |
| I wear gloves as the first step in cleaning surfaces contaminated with blood or other bloody body fluids (C)                             | 580                         | 85.8% |
| Washing with soap and water for 5 minutes is my first step after contact with infective material (C)                                     | 558                         | 82.5% |
| I apply universal precautions in situations that might lead to contact with sweat (W)                                                    | 127                         | 18.8% |
| If I have a wound, I wear gloves before caring for patients (C)                                                                          | 608                         | 89.9% |
| I apply universal precautions in situations that might lead to contact with vaginal discharge (C)                                        | 543                         | 80.3% |

W = Wrong, C= Correct



This document was created with Win2PDF available at <http://www.win2pdf.com>.  
The unregistered version of Win2PDF is for evaluation or non-commercial use only.  
This page will not be added after purchasing Win2PDF.
